# Supplementary material for: Heat-Killed Lacticaseibacillus paracasei Repairs Lipopolysaccharide-Induced Intestinal Epithelial Barrier Damage via MLCK/MLC Pathway Activation
Source: MDPI journal article supplement (doi:10.3390/nu15071758), 2023-04-04
Supplement: s1 [file s1]

# Supplementary Material

**A**

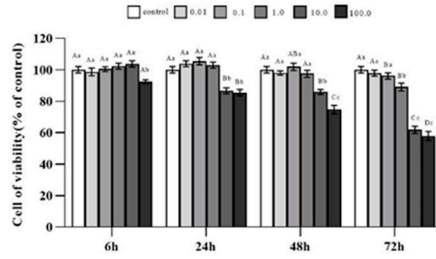

**B**

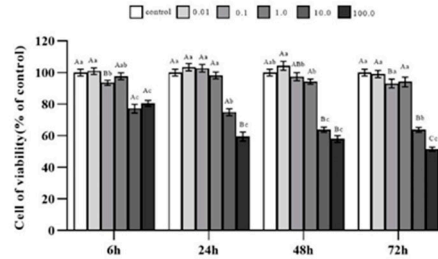

**C**

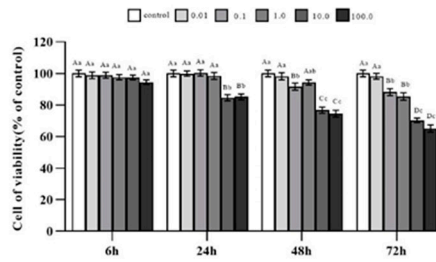

**D**

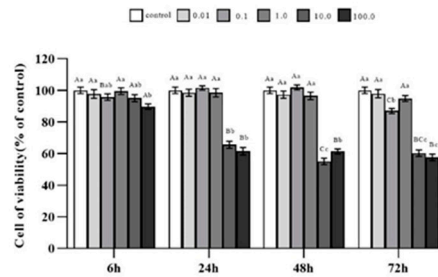

**E**

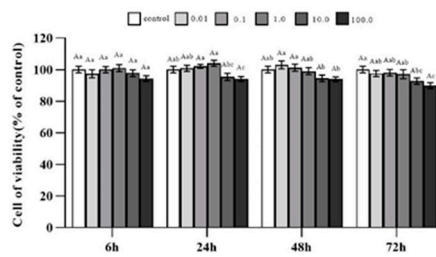

**F**

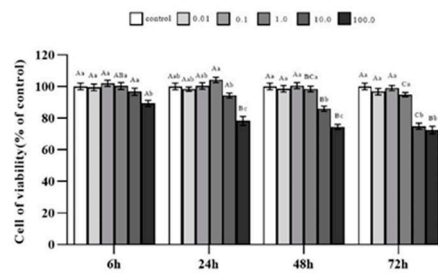

**Supplementary Figure S1** Viability of Caco-2 cells treated with heat-killed *L. paracasei* (HK-LP) (0, 0.01, 0.1, 1, 10, and 100  $\mu\text{g/mL}$ ) for 6, 24, 48, and 72 h. The number of Caco-2 cells treated with HK-LP 6105 culture for 18 h (A) and 48 h (B), 6115 for 18 h (C) and 48 h (D), 6235 culture for 18 h (E), and 48 h (F). Each result is represented as the mean  $\pm$  standard error of the mean (SEM) ( $n = 3$ ). Different lowercase letters indicate significant differences between treatments with different concentrations of HK-LP at the same treatment time ( $p < 0.05$ ). Different capital letters indicate significant differences between treatments with different time at the same HK-LP concentration ( $p < 0.05$ ).
